# Supplementary material
Source: HighWire-hosted journal article supplement (doi:10.1101/rna.080981.126)
Supplement: Supplemental_File_S1.xlsx [file Supplemental_File_S1.xlsx]

## Sheet: Legend
Supplemental file S1. Transcription factor annotation and predicted UALCAN LIHC prognostic biomarkers. The spreadsheet contains annotation information for 182 regulators in the tab EXOSC10 TFs and a list of predicted biomarkers in the tab UALCAN LIHC. The data in the TFs tab were created by instructing OpenAI’s ChatGPT 5 to identify the functional domains of target proteins and to classify them i…

## Sheet: EXOSC10 TFs
Gene	Domain/Function	Category
AHR	bHLH-PAS	DNA-binding TF
ARNTL	bHLH-PAS	DNA-binding TF
ASCL2	bHLH	DNA-binding TF
ATF2	bZIP	DNA-binding TF
BCL3	Rel homology-like	DNA-binding TF
BCL6	BTB-ZF (C2H2 zinc fingers)	DNA-binding TF
CAMTA2	CG-1 DNA-binding domain	DNA-binding TF
CEBPD	bZIP	DNA-binding TF
CEBPG	bZIP	DNA-binding TF
CREB1	bZIP	DNA-binding TF
DLX6	Homeodomain	DNA-binding TF
E2F1	Winged helix	DNA-binding TF
E2F4	Winged helix	DNA-binding TF
E2F5	Winged helix	DNA-binding TF
EGR1	C2H2 zinc fingers	DNA-binding TF
ELF1	ETS domain	DNA-binding TF
ELF3	ETS domain	DNA-binding TF
ELK1	ETS domain	DNA-binding TF
ERF	ETS domain	DNA-binding TF
ETV4	ETS domain	DNA-binding TF
ETV5	ETS domain	DNA-binding TF
ETV6	ETS domain	DNA-binding TF
FOXA2	Forkhead domain	DNA-binding TF
FOXA3	Forkhead domain	DNA-binding TF
FOXC1	Forkhead domain	DNA-binding TF
FOXK1	Forkhead domain	DNA-binding TF
FOXO1	Forkhead domain	DNA-binding TF
FOSL2	bZIP	DNA-binding TF
GABPA	ETS domain	DNA-binding TF
GABPB1	ETS domain	DNA-binding TF
GATA2	C4 zinc finger	DNA-binding TF
GATAD1	C4 zinc finger	DNA-binding TF
GFI1	C2H2 zinc fingers	DNA-binding TF
GLI4	C2H2 zinc fingers	DNA-binding TF
GMEB1	GMEB DNA-binding domain	DNA-binding TF
HES4	bHLH	DNA-binding TF
HEY1	bHLH	DNA-binding TF
HIC2	C2H2 zinc fingers	DNA-binding TF
HIVEP1	C2H2 zinc fingers	DNA-binding TF
HLF	bZIP	DNA-binding TF
HNF1A	Homeodomain-like	DNA-binding TF
HNF1B	Homeodomain-like	DNA-binding TF
HNF4A	Nuclear receptor, C4 zinc finger	DNA-binding TF
HOXA3	Homeodomain	DNA-binding TF
HOXA5	Homeodomain	DNA-binding TF
IKZF4	C2H2 zinc fingers	DNA-binding TF
IKZF5	C2H2 zinc fingers	DNA-binding TF
IRF2	IRF domain	DNA-binding TF
IRF9	IRF domain	DNA-binding TF
ISL2	Homeodomain	DNA-binding TF
KLF6	C2H2 zinc fingers	DNA-binding TF
KLF10	C2H2 zinc fingers	DNA-binding TF
KLF12	C2H2 zinc fingers	DNA-binding TF
KLF16	C2H2 zinc fingers	DNA-binding TF
LBX2	Homeodomain	DNA-binding TF
MAX	bHLH-leucine zipper	DNA-binding TF
MAZ	C2H2 zinc fingers	DNA-binding TF
MEF2D	MADS-box	DNA-binding TF
MEIS1	Homeodomain	DNA-binding TF
MEIS2	Homeodomain	DNA-binding TF
MNX1	Homeodomain	DNA-binding TF
MYBL2	Myb repeats	DNA-binding TF
MYC	bHLH-leucine zipper	DNA-binding TF
NFE2L1	bZIP	DNA-binding TF
NFIC	CTF DNA-binding domain	DNA-binding TF
NFIL3	bZIP	DNA-binding TF
NFKB2	Rel homology domain	DNA-binding TF
NKX3-1	Homeodomain	DNA-binding TF
NR0B2	Nuclear receptor, C4 zinc finger	DNA-binding TF
NR2C2	Nuclear receptor, C4 zinc finger	DNA-binding TF
NR2F2	Nuclear receptor, C4 zinc finger	DNA-binding TF
NR2F6	Nuclear receptor, C4 zinc finger	DNA-binding TF
NR5A1	Nuclear receptor, C4 zinc finger	DNA-binding TF
RXRA	Nuclear receptor, C4 zinc finger	DNA-binding TF
RXRB	Nuclear receptor, C4 zinc finger	DNA-binding TF
PPARA	Nuclear receptor, C4 zinc finger	DNA-binding TF
THRA	Nuclear receptor, C4 zinc finger	DNA-binding TF
NRF1	bZIP	DNA-binding TF
NRL	bZIP	DNA-binding TF
PATZ1	AT-hook + C2H2 zinc fingers	DNA-binding TF
PITX1	Homeodomain	DNA-binding TF
RBPJ	RBPJ DNA-binding domain	DNA-binding TF
RFXAP	Winged helix	DNA-binding TF
SMAD1	MH1 DNA-binding domain	DNA-binding TF
SMAD3	MH1 DNA-binding domain	DNA-binding TF
SMAD4	MH1 DNA-binding domain	DNA-binding TF
SNAI1	C2H2 zinc fingers	DNA-binding TF
SOX6	HMG domain	DNA-binding TF
SOX13	HMG domain	DNA-binding TF
SP1	C2H2 zinc fingers	DNA-binding TF
SP2	C2H2 zinc fingers	DNA-binding TF
SPI1	ETS domain	DNA-binding TF
SRF	MADS-box	DNA-binding TF
TBP	TATA-binding domain	DNA-binding TF
TBX2	T-box DNA-binding domain	DNA-binding TF
TCF7L2	HMG domain	DNA-binding TF
TEAD3	TEA/ATTS DNA-binding domain	DNA-binding TF
TFAP4	bHLH domain	DNA-binding TF
TFDP1	DNA-binding domain	DNA-binding TF
TFDP2	DNA-binding domain	DNA-binding TF
THAP11	THAP zinc finger	DNA-binding TF
THAP9	THAP zinc finger	DNA-binding TF
TP53	p53 DNA-binding domain	DNA-binding TF
UBTF	HMG-box DNA-binding domain	DNA-binding TF
USF2	bHLH-leucine zipper	DNA-binding TF
YY1	C2H2 zinc fingers	DNA-binding TF
AGO2	Argonaute protein	Non-DNA-binding regulator
AHDC1	AT-hook protein (nonspecific DNA-binding)	Non-DNA-binding regulator
AKAP8	Scaffold protein	Non-DNA-binding regulator
ARHGAP35	RhoGAP, cytoskeleton regulator	Non-DNA-binding regulator
ARID4A	ARID domain, transcriptional cofactor	Non-DNA-binding regulator
ARID4B	ARID domain, transcriptional cofactor	Non-DNA-binding regulator
ASH2L	MLL complex subunit	Non-DNA-binding regulator
BRCA1	DNA repair factor, not TF	Non-DNA-binding regulator
BRD4	BET bromodomain protein	Non-DNA-binding regulator
CBX1	HP1 protein, heterochromatin	Non-DNA-binding regulator
CBX5	HP1 protein, heterochromatin	Non-DNA-binding regulator
CHD2	Chromatin remodeler	Non-DNA-binding regulator
DMAP1	DNMT1-associated protein	Non-DNA-binding regulator
DNMT1	DNA methyltransferase	Non-DNA-binding regulator
DR1	TBP-binding repressor	Non-DNA-binding regulator
DRAP1	Transcription repressor	Non-DNA-binding regulator
DZIP1	Centrosomal protein	Non-DNA-binding regulator
EEA1	Endosomal tether	Non-DNA-binding regulator
EED	Polycomb complex subunit	Non-DNA-binding regulator
Epitope	Not a gene/protein	Non-DNA-binding regulator
GLYR1	Chromatin reader	Non-DNA-binding regulator
HCFC1	Host cell factor, cofactor	Non-DNA-binding regulator
HDAC1	Histone deacetylase	Non-DNA-binding regulator
HDAC2	Histone deacetylase	Non-DNA-binding regulator
HMGXB3	HMG-box chromatin protein	Non-DNA-binding regulator
HMGXB4	HMG-box chromatin protein	Non-DNA-binding regulator
HNRNPC	RNA-binding protein	Non-DNA-binding regulator
HNRNPK	RNA-binding protein	Non-DNA-binding regulator
HNRNPL	RNA-binding protein	Non-DNA-binding regulator
HNRNPLL	RNA-binding protein	Non-DNA-binding regulator
HNRNPUL1	RNA-binding protein	Non-DNA-binding regulator
KAT7	Histone acetyltransferase	Non-DNA-binding regulator
KAT8	Histone acetyltransferase	Non-DNA-binding regulator
KDM2A	Histone demethylase	Non-DNA-binding regulator
KDM4B	Histone demethylase	Non-DNA-binding regulator
KDM5A	Histone demethylase	Non-DNA-binding regulator
KDM5B	Histone demethylase	Non-DNA-binding regulator
KMT2A	H3K4 methyltransferase	Non-DNA-binding regulator
KMT2B	H3K4 methyltransferase	Non-DNA-binding regulator
LCOR	Nuclear receptor corepressor	Non-DNA-binding regulator
LCORL	Nuclear receptor corepressor	Non-DNA-binding regulator
MED1	Mediator complex subunit	Non-DNA-binding regulator
MCRS1	Chromatin regulator, scaffold	Non-DNA-binding regulator
MIER3	Transcriptional corepressor	Non-DNA-binding regulator
MTA1	NuRD complex cofactor	Non-DNA-binding regulator
MTF2	Polycomb-like protein	Non-DNA-binding regulator
NCOA1	Nuclear receptor coactivator	Non-DNA-binding regulator
NFKBIZ	NF-κB regulator	Non-DNA-binding regulator
NONO	RNA-binding protein	Non-DNA-binding regulator
PCBP1	Poly(C)-binding protein	Non-DNA-binding regulator
PHF20	PHD finger protein	Non-DNA-binding regulator
PHF21A	PHD finger protein	Non-DNA-binding regulator
PHF5A	PHD finger protein	Non-DNA-binding regulator
PHF8	Histone demethylase	Non-DNA-binding regulator
POGZ	Chromatin regulator	Non-DNA-binding regulator
RCOR1	REST corepressor	Non-DNA-binding regulator
RUVBL1	AAA+ ATPase remodeler	Non-DNA-binding regulator
RUVBL2	AAA+ ATPase remodeler	Non-DNA-binding regulator
SAFB2	Scaffold attachment factor	Non-DNA-binding regulator
SAP130	Splicing factor (SF3b)	Non-DNA-binding regulator
SFPQ	RNA-binding protein	Non-DNA-binding regulator
SIN3A	Corepressor	Non-DNA-binding regulator
SIN3B	Corepressor	Non-DNA-binding regulator
SMARCC1	SWI/SNF subunit	Non-DNA-binding regulator
SNAPC4	snRNA transcription complex	Non-DNA-binding regulator
SPEN	Transcriptional corepressor	Non-DNA-binding regulator
SRSF1	Splicing factor	Non-DNA-binding regulator
TAF1	General transcription factor	Non-DNA-binding regulator
TAF3	General transcription factor	Non-DNA-binding regulator
TARDBP	RNA-binding protein (TDP-43)	Non-DNA-binding regulator
TIGD6	Transposase-derived protein	Non-DNA-binding regulator
TSC22D2	Leucine zipper protein (not TF)	Non-DNA-binding regulator
XRCC5	DNA repair factor (Ku80)	Non-DNA-binding regulator
YEATS2	Chromatin reader	Non-DNA-binding regulator
YEATS4	Chromatin reader	Non-DNA-binding regulator
ZMYM3	MYM zinc finger protein, cofactor	Non-DNA-binding regulator

## Sheet: UALCAN LIHC
Gene symbol	Log rank p-value	High expression : Median survival in days	Low expression : Median survival in days	Analysis links
SF3A3	0	724	2131	GEx Profile
				Survival Profile
CCT4	0	547	2131	GEx Profile
				Survival Profile
C11orf17	0	660	2131	GEx Profile
				Survival Profile
PSRC1	0	724	2486	GEx Profile
				Survival Profile
CBX2	0	452	2131	GEx Profile
				Survival Profile
YBX1	0	724	2131	GEx Profile
				Survival Profile
C12orf11	0	627	2131	GEx Profile
				Survival Profile
SNX5	0	724	2456	GEx Profile
				Survival Profile
C7orf68	0	724	2456	GEx Profile
				Survival Profile
G6PD	0	627	2131	GEx Profile
				Survival Profile
TMEM39B	0	757	2131	GEx Profile
				Survival Profile
RAB32	0	724	2456	GEx Profile
				Survival Profile
PTTG3P	0	547	2131	GEx Profile
				Survival Profile
PTDSS2	0	643	2116	GEx Profile
				Survival Profile
SFPQ	0	724	2131	GEx Profile
				Survival Profile
NEIL3	0	711	2131	GEx Profile
				Survival Profile
WDR75	0	724	2131	GEx Profile
				Survival Profile
KDM1A	0	724	2131	GEx Profile
				Survival Profile
RUVBL1	0	724	2131	GEx Profile
				Survival Profile
DHX37	0	693	2131	GEx Profile
				Survival Profile
NOP56	0	643	2131	GEx Profile
				Survival Profile
TSEN34	0	469	2131	GEx Profile
				Survival Profile
PSMD1	0	757	2456	GEx Profile
				Survival Profile
TOE1	0	711	2131	GEx Profile
				Survival Profile
CDCA8	0	711	2456	GEx Profile
				Survival Profile
FUCA2	0	724	2456	GEx Profile
				Survival Profile
TMEM69	0	724	2131	GEx Profile
				Survival Profile
SLC2A1	0	693	2131	GEx Profile
				Survival Profile
NAE1	0	724	2131	GEx Profile
				Survival Profile
CEP55	0	711	2456	GEx Profile
				Survival Profile
NUP107	0	639	2131	GEx Profile
				Survival Profile
YARS	0	757	2456	GEx Profile
				Survival Profile
TRAPPC3	0	547	2131	GEx Profile
				Survival Profile
SLC39A1	0	757	2131	GEx Profile
				Survival Profile
FARSB	0	633	2131	GEx Profile
				Survival Profile
PRPF19	0	724	2131	GEx Profile
				Survival Profile
MAPKAPK5	0	757	2456	GEx Profile
				Survival Profile
CAD	0	693	2116	GEx Profile
				Survival Profile
LLPH	0	693	2131	GEx Profile
				Survival Profile
ETV5	0	724	2116	GEx Profile
				Survival Profile
CCT5	0	724	2131	GEx Profile
				Survival Profile
FANCE	0	711	2131	GEx Profile
				Survival Profile
TTK	0	711	2131	GEx Profile
				Survival Profile
UTP11L	0	724	2131	GEx Profile
				Survival Profile
BRIX1	1e-07	693	2116	GEx Profile
				Survival Profile
PES1	1e-07	643	2116	GEx Profile
				Survival Profile
HDAC1	1e-07	724	2131	GEx Profile
				Survival Profile
CCT2	1e-07	693	2116	GEx Profile
				Survival Profile
CKLF	1e-07	765	2131	GEx Profile
				Survival Profile
DPH2	1e-07	693	2116	GEx Profile
				Survival Profile
MARS	1e-07	724	2116	GEx Profile
				Survival Profile
PLEKHM2	1e-07	639	2131	GEx Profile
				Survival Profile
GNL2	1e-07	724	2131	GEx Profile
				Survival Profile
KPNA2	1e-07	757	2131	GEx Profile
				Survival Profile
MOGS	1e-07	724	2131	GEx Profile
				Survival Profile
RANBP1	1e-07	711	2116	GEx Profile
				Survival Profile
ZWINT	1e-07	711	2131	GEx Profile
				Survival Profile
CCT7	1e-07	757	2131	GEx Profile
				Survival Profile
KIAA0415	1e-07	724	2131	GEx Profile
				Survival Profile
MEX3A	1e-07	765	2131	GEx Profile
				Survival Profile
POU2F1	1e-07	757	2456	GEx Profile
				Survival Profile
RBM28	1e-07	757	2131	GEx Profile
				Survival Profile
UCK2	1e-07	724	2131	GEx Profile
				Survival Profile
EIF3B	1e-07	601	2116	GEx Profile
				Survival Profile
BTF3L4	1e-07	765	2131	GEx Profile
				Survival Profile
DDX55	1e-07	693	2131	GEx Profile
				Survival Profile
MARCKS	1e-07	757	2131	GEx Profile
				Survival Profile
HDAC2	1e-07	757	2131	GEx Profile
				Survival Profile
FAM98A	2e-07	724	2116	GEx Profile
				Survival Profile
GPATCH3	2e-07	724	2116	GEx Profile
				Survival Profile
ABCC5	2e-07	765	2131	GEx Profile
				Survival Profile
LOC728855	2e-07	765	2456	GEx Profile
				Survival Profile
TUBG1	2e-07	724	2131	GEx Profile
				Survival Profile
GTSE1	2e-07	660	2131	GEx Profile
				Survival Profile
EIF5B	2e-07	770	2456	GEx Profile
				Survival Profile
YTHDF2	2e-07	757	2116	GEx Profile
				Survival Profile
MED19	2e-07	711	2131	GEx Profile
				Survival Profile
PDCD2	2e-07	724	2116	GEx Profile
				Survival Profile
PHF5A	2e-07	757	2116	GEx Profile
				Survival Profile
SAP30	2e-07	693	2116	GEx Profile
				Survival Profile
HTRA2	2e-07	765	2131	GEx Profile
				Survival Profile
CBX3	3e-07	765	2131	GEx Profile
				Survival Profile
RRP12	3e-07	693	2131	GEx Profile
				Survival Profile
CCDC77	3e-07	711	2131	GEx Profile
				Survival Profile
APEX2	3e-07	660	2131	GEx Profile
				Survival Profile
UBE2E1	3e-07	765	2131	GEx Profile
				Survival Profile
EIF2B1	4e-07	660	2116	GEx Profile
				Survival Profile
CCDC137	4e-07	757	2131	GEx Profile
				Survival Profile
SLC4A1AP	4e-07	765	2131	GEx Profile
				Survival Profile
MYBL2	4e-07	724	2131	GEx Profile
				Survival Profile
PPIA	4e-07	556	2116	GEx Profile
				Survival Profile
CHORDC1	5e-07	724	2131	GEx Profile
				Survival Profile
RBM17	5e-07	757	2131	GEx Profile
				Survival Profile
SMS	5e-07	757	2131	GEx Profile
				Survival Profile
MED8	5e-07	724	2131	GEx Profile
				Survival Profile
AP4B1	5e-07	757	2116	GEx Profile
				Survival Profile
GTF3C2	5e-07	765	2131	GEx Profile
				Survival Profile
C1orf91	5e-07	724	2116	GEx Profile
				Survival Profile
UBE2L3	5e-07	724	2131	GEx Profile
				Survival Profile
ZCCHC17	5e-07	724	2131	GEx Profile
				Survival Profile
TCOF1	5e-07	757	2116	GEx Profile
				Survival Profile
TBP	5e-07	724	2131	GEx Profile
				Survival Profile
TTC1	5e-07	765	2131	GEx Profile
				Survival Profile
GPN2	6e-07	765	2131	GEx Profile
				Survival Profile
ATG3	6e-07	660	2131	GEx Profile
				Survival Profile
DPM1	6e-07	765	2456	GEx Profile
				Survival Profile
SMG5	6e-07	765	2131	GEx Profile
				Survival Profile
STIP1	6e-07	660	2116	GEx Profile
				Survival Profile
PFN2	6e-07	765	2131	GEx Profile
				Survival Profile
KIF20A	6e-07	649	2131	GEx Profile
				Survival Profile
NAT10	7e-07	693	2131	GEx Profile
				Survival Profile
MCM10	7e-07	757	2131	GEx Profile
				Survival Profile
PDRG1	7e-07	899	2456	GEx Profile
				Survival Profile
PHC2	7e-07	757	2456	GEx Profile
				Survival Profile
PPT1	7e-07	757	2131	GEx Profile
				Survival Profile
GLRX3	7e-07	765	2116	GEx Profile
				Survival Profile
COMMD3	7e-07	757	2456	GEx Profile
				Survival Profile
FEZ2	7e-07	802	2131	GEx Profile
				Survival Profile
GRK6	7e-07	827	2131	GEx Profile
				Survival Profile
SLC16A3	7e-07	757	2131	GEx Profile
				Survival Profile
KIF15	7e-07	711	2131	GEx Profile
				Survival Profile
INTS4	7e-07	757	2116	GEx Profile
				Survival Profile
POLR3F	8e-07	724	2131	GEx Profile
				Survival Profile
VIPAR	8e-07	827	2131	GEx Profile
				Survival Profile
MAGEA5	8e-07	802	2131	GEx Profile
				Survival Profile
GTPBP4	8e-07	757	2131	GEx Profile
				Survival Profile
NPC1	8e-07	757	2116	GEx Profile
				Survival Profile
DCUN1D5	9e-07	757	2131	GEx Profile
				Survival Profile
MEMO1	9e-07	639	2116	GEx Profile
				Survival Profile
SLC7A11	9e-07	757	2116	GEx Profile
				Survival Profile
BUB3	9e-07	765	2131	GEx Profile
				Survival Profile
MPV17	9e-07	931	2131	GEx Profile
				Survival Profile
ENO1	9e-07	660	2131	GEx Profile
				Survival Profile
RRP8	9e-07	693	2131	GEx Profile
				Survival Profile
MPHOSPH6	1e-06	765	2131	GEx Profile
				Survival Profile
CSE1L	1e-06	757	2116	GEx Profile
				Survival Profile
ZCRB1	1e-06	724	2131	GEx Profile
				Survival Profile
IPO4	1e-06	693	2116	GEx Profile
				Survival Profile
MTMR2	1e-06	765	2131	GEx Profile
				Survival Profile
LRRC41	1.1e-06	757	2131	GEx Profile
				Survival Profile
ACTR6	1.1e-06	724	2131	GEx Profile
				Survival Profile
UBAP2	1.2e-06	765	2131	GEx Profile
				Survival Profile
GAGE12J	1.2e-06	757	2131	GEx Profile
				Survival Profile
PPP1R8	1.3e-06	765	2131	GEx Profile
				Survival Profile
C3orf26	1.3e-06	765	2131	GEx Profile
				Survival Profile
SSB	1.4e-06	827	2131	GEx Profile
				Survival Profile
DCTN2	1.4e-06	757	2131	GEx Profile
				Survival Profile
TOP2B	1.4e-06	765	2131	GEx Profile
				Survival Profile
ZNF643	1.4e-06	765	2116	GEx Profile
				Survival Profile
FASTKD3	1.4e-06	660	2131	GEx Profile
				Survival Profile
CDK1	1.5e-06	757	2131	GEx Profile
				Survival Profile
PLOD2	1.5e-06	660	2116	GEx Profile
				Survival Profile
REXO4	1.5e-06	757	2116	GEx Profile
				Survival Profile
CENPA	1.6e-06	724	2116	GEx Profile
				Survival Profile
SETD8	1.6e-06	724	2116	GEx Profile
				Survival Profile
SFRS9	1.6e-06	757	2131	GEx Profile
				Survival Profile
CCDC99	1.7e-06	757	2131	GEx Profile
				Survival Profile
KIF4A	1.8e-06	724	2131	GEx Profile
				Survival Profile
HN1	1.8e-06	765	2131	GEx Profile
				Survival Profile
PAK1IP1	1.8e-06	802	2116	GEx Profile
				Survival Profile
MRTO4	1.9e-06	724	2116	GEx Profile
				Survival Profile
ZBTB40	1.9e-06	827	2131	GEx Profile
				Survival Profile
POC5	1.9e-06	765	2131	GEx Profile
				Survival Profile
ZDHHC18	1.9e-06	765	2116	GEx Profile
				Survival Profile
RTN3	2e-06	757	2116	GEx Profile
				Survival Profile
TMEM81	2e-06	643	2116	GEx Profile
				Survival Profile
WSB2	2.1e-06	660	2116	GEx Profile
				Survival Profile
ASAP1	2.2e-06	837	2116	GEx Profile
				Survival Profile
CNOT6	2.3e-06	827	2131	GEx Profile
				Survival Profile
BEND3	2.3e-06	757	2131	GEx Profile
				Survival Profile
DVL2	2.3e-06	802	2116	GEx Profile
				Survival Profile
HMMR	2.3e-06	724	2116	GEx Profile
				Survival Profile
ADPRHL2	2.3e-06	757	2131	GEx Profile
				Survival Profile
NUP43	2.3e-06	757	2131	GEx Profile
				Survival Profile
CCNE2	2.4e-06	724	2131	GEx Profile
				Survival Profile
NCL	2.4e-06	765	2131	GEx Profile
				Survival Profile
AHSA1	2.4e-06	802	2131	GEx Profile
				Survival Profile
NUDC	2.5e-06	757	2116	GEx Profile
				Survival Profile
PIGU	2.5e-06	899	2131	GEx Profile
				Survival Profile
NAP1L4	2.5e-06	724	2131	GEx Profile
				Survival Profile
C2orf44	2.6e-06	765	2116	GEx Profile
				Survival Profile
HSF2	2.6e-06	765	2131	GEx Profile
				Survival Profile
RNF34	2.6e-06	765	2131	GEx Profile
				Survival Profile
GAGE2D	2.6e-06	765	2116	GEx Profile
				Survival Profile
NAP1L1	2.6e-06	757	2131	GEx Profile
				Survival Profile
ZC3HC1	2.6e-06	757	2131	GEx Profile
				Survival Profile
ME2	2.7e-06	757	2116	GEx Profile
				Survival Profile
WDR77	2.7e-06	765	2116	GEx Profile
				Survival Profile
LYPLA2P1	2.7e-06	765	2131	GEx Profile
				Survival Profile
NARS	2.8e-06	802	2116	GEx Profile
				Survival Profile
SAE1	2.8e-06	757	2131	GEx Profile
				Survival Profile
AMZ2	2.8e-06	757	2131	GEx Profile
				Survival Profile
TMEM120B	2.8e-06	724	2116	GEx Profile
				Survival Profile
UBXN2A	2.8e-06	765	2131	GEx Profile
				Survival Profile
CKS2	2.9e-06	768	2131	GEx Profile
				Survival Profile
ANP32B	2.9e-06	757	2131	GEx Profile
				Survival Profile
GAGE12D	2.9e-06	765	2131	GEx Profile
				Survival Profile
MAST2	3e-06	765	2116	GEx Profile
				Survival Profile
SPATS2	3e-06	765	2131	GEx Profile
				Survival Profile
RAN	3e-06	765	2131	GEx Profile
				Survival Profile
MCM2	3.1e-06	757	2131	GEx Profile
				Survival Profile
ASF1A	3.1e-06	765	2116	GEx Profile
				Survival Profile
PNO1	3.1e-06	765	2116	GEx Profile
				Survival Profile
GINS1	3.1e-06	757	2131	GEx Profile
				Survival Profile
CDCA7L	3.1e-06	765	2131	GEx Profile
				Survival Profile
KIAA0406	3.1e-06	827	2131	GEx Profile
				Survival Profile
OLA1	3.2e-06	757	2131	GEx Profile
				Survival Profile
CCNB1	3.3e-06	724	2116	GEx Profile
				Survival Profile
TRMT6	3.4e-06	765	2116	GEx Profile
				Survival Profile
PSMB2	3.4e-06	757	2116	GEx Profile
				Survival Profile
MTF2	3.5e-06	765	2131	GEx Profile
				Survival Profile
WASF1	3.6e-06	837	2131	GEx Profile
				Survival Profile
JMJD6	3.7e-06	768	2131	GEx Profile
				Survival Profile
KDM3A	3.7e-06	827	2131	GEx Profile
				Survival Profile
RIC8A	3.8e-06	757	2131	GEx Profile
				Survival Profile
PLEKHA9	3.9e-06	757	2116	GEx Profile
				Survival Profile
PPIAL4G	3.9e-06	757	2116	GEx Profile
				Survival Profile
C1orf159	3.9e-06	765	1852	GEx Profile
				Survival Profile
SMARCD1	4e-06	765	2131	GEx Profile
				Survival Profile
NME1	4e-06	649	2131	GEx Profile
				Survival Profile
ATIC	4.1e-06	837	2131	GEx Profile
				Survival Profile
KIN	4.2e-06	765	2131	GEx Profile
				Survival Profile
ZBTB8OS	4.2e-06	765	2131	GEx Profile
				Survival Profile
BAG2	4.2e-06	765	2116	GEx Profile
				Survival Profile
C20orf20	4.2e-06	765	2131	GEx Profile
				Survival Profile
PRPF38A	4.2e-06	757	2116	GEx Profile
				Survival Profile
SNHG12	4.3e-06	765	2131	GEx Profile
				Survival Profile
CD58	4.3e-06	931	2131	GEx Profile
				Survival Profile
C22orf9	4.4e-06	1005	2131	GEx Profile
				Survival Profile
STX3	4.5e-06	837	2116	GEx Profile
				Survival Profile
LRPPRC	4.6e-06	827	2116	GEx Profile
				Survival Profile
B3GAT3	4.7e-06	724	2116	GEx Profile
				Survival Profile
COPB2	4.7e-06	724	2116	GEx Profile
				Survival Profile
CBX8	4.7e-06	757	2131	GEx Profile
				Survival Profile
TRIM54	4.7e-06	757	2131	GEx Profile
				Survival Profile
LPCAT1	4.8e-06	765	2116	GEx Profile
				Survival Profile
STRAP	4.8e-06	660	2116	GEx Profile
				Survival Profile
PTTG1	4.9e-06	660	2116	GEx Profile
				Survival Profile
DENR	4.9e-06	724	2116	GEx Profile
				Survival Profile
THOC5	5e-06	724	2116	GEx Profile
				Survival Profile
PPFIA4	5e-06	802	2116	GEx Profile
				Survival Profile
ADAMTS5	5e-06	837	2116	GEx Profile
				Survival Profile
UBE2T	5e-06	765	2131	GEx Profile
				Survival Profile
TBX19	5.1e-06	765	2131	GEx Profile
				Survival Profile
GAGE4	5.1e-06	724	2116	GEx Profile
				Survival Profile
BCAS2	5.2e-06	768	2131	GEx Profile
				Survival Profile
TMEM218	5.3e-06	765	2116	GEx Profile
				Survival Profile
NASP	5.3e-06	724	2116	GEx Profile
				Survival Profile
CDCA3	5.4e-06	757	2116	GEx Profile
				Survival Profile
CENPW	5.5e-06	757	2131	GEx Profile
				Survival Profile
GAD1	5.5e-06	802	2131	GEx Profile
				Survival Profile
PA2G4	5.5e-06	660	2116	GEx Profile
				Survival Profile
ZNF544	5.6e-06	837	2131	GEx Profile
				Survival Profile
LYPLA2	5.6e-06	724	2131	GEx Profile
				Survival Profile
ZNF202	5.6e-06	724	2116	GEx Profile
				Survival Profile
ANAPC7	5.6e-06	765	2116	GEx Profile
				Survival Profile
RPS14	5.6e-06	711	2131	GEx Profile
				Survival Profile
FANCL	5.7e-06	757	2116	GEx Profile
				Survival Profile
CAP1	5.8e-06	765	2116	GEx Profile
				Survival Profile
PABPC4	5.8e-06	724	1852	GEx Profile
				Survival Profile
TRPC4AP	5.8e-06	757	2131	GEx Profile
				Survival Profile
C17orf86	6.2e-06	757	2116	GEx Profile
				Survival Profile
KIAA0100	6.3e-06	724	2116	GEx Profile
				Survival Profile
TUBA1B	6.3e-06	757	2116	GEx Profile
				Survival Profile
TBPL1	6.3e-06	765	2116	GEx Profile
				Survival Profile
SIRT7	6.5e-06	848	2131	GEx Profile
				Survival Profile
C2orf29	6.5e-06	837	2131	GEx Profile
				Survival Profile
ST6GALNAC4	6.6e-06	1135	2131	GEx Profile
				Survival Profile
POLG2	6.7e-06	724	2116	GEx Profile
				Survival Profile
GTDC1	6.7e-06	765	2131	GEx Profile
				Survival Profile
KCTD8	6.8e-06	899	2116	GEx Profile
				Survival Profile
METAP1	6.8e-06	827	2116	GEx Profile
				Survival Profile
FAM118B	6.8e-06	724	1852	GEx Profile
				Survival Profile
PFKFB4	6.8e-06	827	2116	GEx Profile
				Survival Profile
C14orf109	6.9e-06	765	2131	GEx Profile
				Survival Profile
C3orf10	6.9e-06	827	2456	GEx Profile
				Survival Profile
TPX2	6.9e-06	765	2131	GEx Profile
				Survival Profile
TRNAU1AP	7e-06	757	2116	GEx Profile
				Survival Profile
CNOT10	7e-06	757	2116	GEx Profile
				Survival Profile
NAT9	7.1e-06	848	2131	GEx Profile
				Survival Profile
ZNF346	7.3e-06	765	2116	GEx Profile
				Survival Profile
HOXD9	7.3e-06	802	2131	GEx Profile
				Survival Profile
CNO	7.4e-06	1005	2131	GEx Profile
				Survival Profile
LOC643387	7.4e-06	757	2456	GEx Profile
				Survival Profile
PA2G4P4	7.5e-06	660	2131	GEx Profile
				Survival Profile
ZNF239	7.5e-06	837	2131	GEx Profile
				Survival Profile
IK	7.5e-06	757	2116	GEx Profile
				Survival Profile
FOXK1	7.5e-06	724	2116	GEx Profile
				Survival Profile
SKA1	7.6e-06	724	2116	GEx Profile
				Survival Profile
C19orf61	7.7e-06	899	2116	GEx Profile
				Survival Profile
GNB2L1	7.8e-06	643	2116	GEx Profile
				Survival Profile
GTF2H1	7.9e-06	757	2116	GEx Profile
				Survival Profile
ILK	8e-06	757	2116	GEx Profile
				Survival Profile
SMYD5	8.1e-06	765	2116	GEx Profile
				Survival Profile
YRDC	8.1e-06	837	2131	GEx Profile
				Survival Profile
SPP1	8.2e-06	765	2116	GEx Profile
				Survival Profile
TXNDC12	8.3e-06	765	2131	GEx Profile
				Survival Profile
PFDN1	8.4e-06	931	2116	GEx Profile
				Survival Profile
IARS	8.4e-06	765	2116	GEx Profile
				Survival Profile
NME6	8.5e-06	931	2131	GEx Profile
				Survival Profile
CCT6A	8.6e-06	724	2116	GEx Profile
				Survival Profile
RAB3IL1	8.7e-06	765	2131	GEx Profile
				Survival Profile
TRAPPC4	8.8e-06	1005	2131	GEx Profile
				Survival Profile
KIF2C	9e-06	757	2131	GEx Profile
				Survival Profile
SNX8	9.3e-06	724	2116	GEx Profile
				Survival Profile
BCOR	9.4e-06	765	2131	GEx Profile
				Survival Profile
TYW3	9.5e-06	757	2131	GEx Profile
				Survival Profile
ERGIC3	9.5e-06	837	2456	GEx Profile
				Survival Profile
CDC45	9.6e-06	757	2116	GEx Profile
				Survival Profile
PAPSS1	9.6e-06	827	2116	GEx Profile
				Survival Profile
CCDC34	9.8e-06	765	2131	GEx Profile
				Survival Profile
PPIL1	9.8e-06	765	2116	GEx Profile
				Survival Profile
FOXK2	1e-05	837	2116	GEx Profile
				Survival Profile
GLMN	1e-05	768	2131	GEx Profile
				Survival Profile
OGG1	1.01e-05	837	2131	GEx Profile
				Survival Profile
SLC38A6	1.02e-05	765	2131	GEx Profile
				Survival Profile
SNRNP40	1.02e-05	765	2116	GEx Profile
				Survival Profile
C7orf44	1.04e-05	757	2116	GEx Profile
				Survival Profile
RARS	1.04e-05	765	1852	GEx Profile
				Survival Profile
FAM136A	1.05e-05	757	2116	GEx Profile
				Survival Profile
AK2	1.05e-05	837	2456	GEx Profile
				Survival Profile
CDC25A	1.06e-05	768	2131	GEx Profile
				Survival Profile
HINFP	1.06e-05	757	2131	GEx Profile
				Survival Profile
SEC61A1	1.08e-05	660	2116	GEx Profile
				Survival Profile
TXLNA	1.08e-05	765	2116	GEx Profile
				Survival Profile
SMOX	1.09e-05	802	2131	GEx Profile
				Survival Profile
NCAPD2	1.11e-05	757	2116	GEx Profile
				Survival Profile
TAF3	1.11e-05	827	2131	GEx Profile
				Survival Profile
PSMD14	1.11e-05	768	2131	GEx Profile
				Survival Profile
ADSL	1.11e-05	724	2116	GEx Profile
				Survival Profile
SEPHS1	1.12e-05	765	2131	GEx Profile
				Survival Profile
KIAA1841	1.14e-05	765	2116	GEx Profile
				Survival Profile
BMI1	1.15e-05	827	2131	GEx Profile
				Survival Profile
NDC80	1.16e-05	711	2116	GEx Profile
				Survival Profile
HNRNPH1	1.17e-05	765	2131	GEx Profile
				Survival Profile
ACAD9	1.18e-05	765	2131	GEx Profile
				Survival Profile
AXIN1	1.2e-05	765	2131	GEx Profile
				Survival Profile
ANP32C	1.2e-05	757	2131	GEx Profile
				Survival Profile
ZNF160	1.21e-05	848	2116	GEx Profile
				Survival Profile
CIRH1A	1.21e-05	827	2131	GEx Profile
				Survival Profile
FAM164A	1.21e-05	1005	2116	GEx Profile
				Survival Profile
TRIM28	1.21e-05	643	2116	GEx Profile
				Survival Profile
TUBA1C	1.22e-05	765	2116	GEx Profile
				Survival Profile
PQLC2	1.23e-05	724	2116	GEx Profile
				Survival Profile
IMMT	1.26e-05	765	2131	GEx Profile
				Survival Profile
DTYMK	1.26e-05	765	2131	GEx Profile
				Survival Profile
ZKSCAN4	1.27e-05	827	2131	GEx Profile
				Survival Profile
PPM1G	1.29e-05	765	2116	GEx Profile
				Survival Profile
PTP4A2	1.31e-05	765	2116	GEx Profile
				Survival Profile
KDELR1	1.35e-05	827	2131	GEx Profile
				Survival Profile
TRNP1	1.36e-05	802	2131	GEx Profile
				Survival Profile
CCNF	1.37e-05	724	2116	GEx Profile
				Survival Profile
HSPA14	1.38e-05	765	2116	GEx Profile
				Survival Profile
EIF4G3	1.42e-05	765	2116	GEx Profile
				Survival Profile
TMEM106C	1.42e-05	765	2116	GEx Profile
				Survival Profile
STK25	1.43e-05	827	2116	GEx Profile
				Survival Profile
WDR53	1.43e-05	765	2116	GEx Profile
				Survival Profile
ZBTB17	1.44e-05	757	2116	GEx Profile
				Survival Profile
WDR12	1.45e-05	765	2116	GEx Profile
				Survival Profile
XPO5	1.45e-05	802	2116	GEx Profile
				Survival Profile
RPE	1.47e-05	757	2116	GEx Profile
				Survival Profile
VPS33A	1.47e-05	765	2116	GEx Profile
				Survival Profile
LOC284023	1.48e-05	837	2131	GEx Profile
				Survival Profile
CCDC123	1.51e-05	757	2116	GEx Profile
				Survival Profile
DYNLL1	1.52e-05	765	2131	GEx Profile
				Survival Profile
NCDN	1.53e-05	765	2116	GEx Profile
				Survival Profile
PRPF3	1.55e-05	765	2131	GEx Profile
				Survival Profile
METTL1	1.56e-05	693	2116	GEx Profile
				Survival Profile
GNA12	1.57e-05	765	2116	GEx Profile
				Survival Profile
CENPO	1.6e-05	724	2131	GEx Profile
				Survival Profile
LRRC59	1.61e-05	757	2131	GEx Profile
				Survival Profile
ZNF384	1.63e-05	765	2116	GEx Profile
				Survival Profile
KIAA0090	1.64e-05	757	2116	GEx Profile
				Survival Profile
STX1A	1.67e-05	837	2131	GEx Profile
				Survival Profile
GMEB1	1.68e-05	765	2116	GEx Profile
				Survival Profile
HAUS5	1.68e-05	757	2116	GEx Profile
				Survival Profile
ACTR5	1.7e-05	899	2116	GEx Profile
				Survival Profile
ACACA	1.7e-05	1005	2116	GEx Profile
				Survival Profile
WDR8	1.7e-05	837	2116	GEx Profile
				Survival Profile
ATP13A2	1.71e-05	757	2116	GEx Profile
				Survival Profile
AP1B1	1.71e-05	765	2131	GEx Profile
				Survival Profile
SRD5A3	1.71e-05	724	2131	GEx Profile
				Survival Profile
VRK2	1.74e-05	837	2116	GEx Profile
				Survival Profile
METTL5	1.75e-05	837	2131	GEx Profile
				Survival Profile
EXOSC2	1.76e-05	837	2116	GEx Profile
				Survival Profile
FUBP1	1.76e-05	827	2116	GEx Profile
				Survival Profile
PLK1	1.76e-05	765	2116	GEx Profile
				Survival Profile
C16orf57	1.8e-05	1005	2131	GEx Profile
				Survival Profile
C14orf142	1.81e-05	724	2116	GEx Profile
				Survival Profile
LOC341056	1.81e-05	757	2131	GEx Profile
				Survival Profile
RPF1	1.82e-05	765	2116	GEx Profile
				Survival Profile
THOC1	1.84e-05	724	2116	GEx Profile
				Survival Profile
CDC123	1.86e-05	765	2116	GEx Profile
				Survival Profile
IDI2	1.9e-05	765	2116	GEx Profile
				Survival Profile
PKNOX1	1.92e-05	899	2116	GEx Profile
				Survival Profile
STAM	1.98e-05	899	2131	GEx Profile
				Survival Profile
C1orf109	1.98e-05	757	2116	GEx Profile
				Survival Profile
NUP93	1.99e-05	837	2131	GEx Profile
				Survival Profile
RIT1	2e-05	899	2131	GEx Profile
				Survival Profile
GTPBP2	2.01e-05	765	2131	GEx Profile
				Survival Profile
RNASEH1	2.02e-05	848	2131	GEx Profile
				Survival Profile
KCMF1	2.04e-05	765	2116	GEx Profile
				Survival Profile
TUBAL3	2.05e-05	837	2532	GEx Profile
				Survival Profile
RAE1	2.06e-05	899	2131	GEx Profile
				Survival Profile
GPN1	2.06e-05	899	2131	GEx Profile
				Survival Profile
POLA2	2.09e-05	724	2116	GEx Profile
				Survival Profile
SF1	2.1e-05	848	2131	GEx Profile
				Survival Profile
RBM45	2.1e-05	837	2131	GEx Profile
				Survival Profile
SFRS3	2.1e-05	765	2131	GEx Profile
				Survival Profile
KIF18A	2.11e-05	757	2116	GEx Profile
				Survival Profile
ABCF3	2.11e-05	724	2116	GEx Profile
				Survival Profile
SLC38A1	2.13e-05	765	2131	GEx Profile
				Survival Profile
NCAPG	2.14e-05	757	2116	GEx Profile
				Survival Profile
LYAR	2.15e-05	757	2116	GEx Profile
				Survival Profile
PPAT	2.15e-05	827	1852	GEx Profile
				Survival Profile
CCDC127	2.18e-05	765	2131	GEx Profile
				Survival Profile
C9orf140	2.2e-05	899	2131	GEx Profile
				Survival Profile
NPLOC4	2.21e-05	765	2131	GEx Profile
				Survival Profile
PRIM1	2.22e-05	724	2116	GEx Profile
				Survival Profile
C17orf95	2.24e-05	837	2131	GEx Profile
				Survival Profile
PSMD12	2.25e-05	768	2116	GEx Profile
				Survival Profile
CEP250	2.26e-05	848	2131	GEx Profile
				Survival Profile
CTPS2	2.28e-05	899	2116	GEx Profile
				Survival Profile
C12orf65	2.29e-05	693	2116	GEx Profile
				Survival Profile
LRP10	2.3e-05	1088	2486	GEx Profile
				Survival Profile
SIP1	2.31e-05	757	2131	GEx Profile
				Survival Profile
CDK16	2.41e-05	899	2131	GEx Profile
				Survival Profile
NUDCD1	2.44e-05	802	2116	GEx Profile
				Survival Profile
CASZ1	2.45e-05	724	2116	GEx Profile
				Survival Profile
WASF2	2.46e-05	1135	2116	GEx Profile
				Survival Profile
MBOAT7	2.47e-05	765	2116	GEx Profile
				Survival Profile
XPOT	2.47e-05	765	1852	GEx Profile
				Survival Profile
CSNK1E	2.49e-05	899	2131	GEx Profile
				Survival Profile
EHD1	2.49e-05	765	1852	GEx Profile
				Survival Profile
DNASE1L3	2.49e-05	2456	1271	GEx Profile
				Survival Profile
MTHFD1L	2.5e-05	837	2116	GEx Profile
				Survival Profile
KIF11	2.52e-05	765	2116	GEx Profile
				Survival Profile
CDC6	2.53e-05	765	2116	GEx Profile
				Survival Profile
RAD1	2.53e-05	724	2116	GEx Profile
				Survival Profile
ARHGAP39	2.55e-05	1005	2131	GEx Profile
				Survival Profile
DDX27	2.59e-05	899	2131	GEx Profile
				Survival Profile
PSMD2	2.6e-05	765	2116	GEx Profile
				Survival Profile
MANBA	2.6e-05	765	2116	GEx Profile
				Survival Profile
CHEK1	2.61e-05	768	2116	GEx Profile
				Survival Profile
CDC20	2.62e-05	724	2116	GEx Profile
				Survival Profile
KPTN	2.62e-05	757	2131	GEx Profile
				Survival Profile
COX4NB	2.65e-05	765	2116	GEx Profile
				Survival Profile
RP9	2.66e-05	837	2131	GEx Profile
				Survival Profile
TCEB3	2.66e-05	837	2131	GEx Profile
				Survival Profile
EIF3M	2.66e-05	724	2116	GEx Profile
				Survival Profile
NLE1	2.68e-05	757	2116	GEx Profile
				Survival Profile
RPA1	2.69e-05	837	2116	GEx Profile
				Survival Profile
C20orf43	2.71e-05	765	2116	GEx Profile
				Survival Profile
RGS14	2.75e-05	837	2131	GEx Profile
				Survival Profile
SQSTM1	2.75e-05	837	2116	GEx Profile
				Survival Profile
NR0B1	2.76e-05	837	2116	GEx Profile
				Survival Profile
EBNA1BP2	2.8e-05	757	2116	GEx Profile
				Survival Profile
NCBP2	2.8e-05	899	2116	GEx Profile
				Survival Profile
S100PBP	2.81e-05	768	2131	GEx Profile
				Survival Profile
FAM72B	2.81e-05	757	2116	GEx Profile
				Survival Profile
C1orf84	2.82e-05	837	2116	GEx Profile
				Survival Profile
EIF2S1	2.84e-05	765	2116	GEx Profile
				Survival Profile
TSSC1	2.86e-05	931	2131	GEx Profile
				Survival Profile
DDN	2.87e-05	837	2131	GEx Profile
				Survival Profile
C14orf33	2.88e-05	765	2116	GEx Profile
				Survival Profile
GRB2	2.9e-05	837	2131	GEx Profile
				Survival Profile
UBE2C	2.93e-05	757	2131	GEx Profile
				Survival Profile
TARDBP	2.95e-05	827	2131	GEx Profile
				Survival Profile
MRPL3	2.95e-05	765	2116	GEx Profile
				Survival Profile
TSEN2	2.95e-05	827	2116	GEx Profile
				Survival Profile
CA5BP	2.96e-05	837	2116	GEx Profile
				Survival Profile
C2orf43	2.98e-05	1005	2116	GEx Profile
				Survival Profile
HNRNPA3P1	2.98e-05	765	2131	GEx Profile
				Survival Profile
ATP6V0E1	3e-05	931	2116	GEx Profile
				Survival Profile
HGS	3.04e-05	757	2116	GEx Profile
				Survival Profile
C11orf82	3.05e-05	765	2131	GEx Profile
				Survival Profile
MKNK1	3.05e-05	837	2131	GEx Profile
				Survival Profile
C20orf4	3.07e-05	765	2131	GEx Profile
				Survival Profile
SSRP1	3.1e-05	724	2116	GEx Profile
				Survival Profile
PL-5283	3.11e-05	757	2116	GEx Profile
				Survival Profile
NOP58	3.12e-05	765	2116	GEx Profile
				Survival Profile
YARS2	3.12e-05	827	2116	GEx Profile
				Survival Profile
USP48	3.16e-05	765	2116	GEx Profile
				Survival Profile
PFKP	3.17e-05	931	2486	GEx Profile
				Survival Profile
YEATS2	3.19e-05	899	2116	GEx Profile
				Survival Profile
TXNL4A	3.2e-05	724	2131	GEx Profile
				Survival Profile
TRIM65	3.21e-05	802	2116	GEx Profile
				Survival Profile
PPCS	3.23e-05	837	2116	GEx Profile
				Survival Profile
KIAA1522	3.24e-05	757	2116	GEx Profile
				Survival Profile
GARS	3.24e-05	837	2116	GEx Profile
				Survival Profile
PKM2	3.31e-05	899	2116	GEx Profile
				Survival Profile
NRBP1	3.32e-05	837	2131	GEx Profile
				Survival Profile
STRN4	3.34e-05	1005	2116	GEx Profile
				Survival Profile
RTCD1	3.34e-05	1005	2116	GEx Profile
				Survival Profile
C20orf72	3.43e-05	765	2116	GEx Profile
				Survival Profile
DLGAP5	3.43e-05	765	2131	GEx Profile
				Survival Profile
RHEBL1	3.44e-05	765	2116	GEx Profile
				Survival Profile
PKIB	3.44e-05	1149	2131	GEx Profile
				Survival Profile
BCAT1	3.45e-05	1005	2116	GEx Profile
				Survival Profile
C3orf39	3.46e-05	765	2131	GEx Profile
				Survival Profile
DHDH	3.46e-05	848	2131	GEx Profile
				Survival Profile
MSH2	3.48e-05	765	2116	GEx Profile
				Survival Profile
XPO1	3.49e-05	899	2456	GEx Profile
				Survival Profile
SFRS2	3.5e-05	768	2116	GEx Profile
				Survival Profile
TSGA14	3.53e-05	837	2116	GEx Profile
				Survival Profile
PSMB5	3.53e-05	931	2131	GEx Profile
				Survival Profile
POLR2L	3.56e-05	643	2116	GEx Profile
				Survival Profile
TREM1	3.6e-05	1005	2532	GEx Profile
				Survival Profile
FBXO30	3.62e-05	765	2116	GEx Profile
				Survival Profile
RPL23AP7	3.63e-05	1005	2131	GEx Profile
				Survival Profile
VPS35	3.64e-05	837	2131	GEx Profile
				Survival Profile
DYNC1LI1	3.69e-05	899	2116	GEx Profile
				Survival Profile
AKIRIN1	3.7e-05	837	2131	GEx Profile
				Survival Profile
EIF4G1	3.7e-05	765	2116	GEx Profile
				Survival Profile
PAEP	3.72e-05	1005	2131	GEx Profile
				Survival Profile
LYRM2	3.72e-05	827	2131	GEx Profile
				Survival Profile
DNTTIP1	3.74e-05	899	2131	GEx Profile
				Survival Profile
C11orf84	3.75e-05	1005	2116	GEx Profile
				Survival Profile
THAP8	3.77e-05	837	2131	GEx Profile
				Survival Profile
ADCK1	3.78e-05	1088	2131	GEx Profile
				Survival Profile
NRD1	3.8e-05	827	2116	GEx Profile
				Survival Profile
MRPL37	3.81e-05	827	2131	GEx Profile
				Survival Profile
ANAPC13	3.82e-05	1005	2131	GEx Profile
				Survival Profile
SPDYA	3.85e-05	837	2116	GEx Profile
				Survival Profile
NUP62	3.87e-05	765	2116	GEx Profile
				Survival Profile
NAA15	3.87e-05	724	2116	GEx Profile
				Survival Profile
SLC1A5	3.87e-05	765	2116	GEx Profile
				Survival Profile
TM2D1	3.9e-05	768	2131	GEx Profile
				Survival Profile
EZH2	3.94e-05	724	2116	GEx Profile
				Survival Profile
FAM163A	3.94e-05	899	2131	GEx Profile
				Survival Profile
DDX1	3.94e-05	837	2131	GEx Profile
				Survival Profile
NUTF2	3.95e-05	802	2131	GEx Profile
				Survival Profile
NFKBIL2	3.96e-05	1149	2116	GEx Profile
				Survival Profile
TMEM41B	3.98e-05	757	2116	GEx Profile
				Survival Profile
SRRD	4e-05	639	1852	GEx Profile
				Survival Profile
EXOSC10	4e-05	765	2116	GEx Profile
				Survival Profile
POP4	4.03e-05	757	2131	GEx Profile
				Survival Profile
OSBP2	4.1e-05	899	2131	GEx Profile
				Survival Profile
PRDX1	4.12e-05	757	2116	GEx Profile
				Survival Profile
HSPB11	4.13e-05	711	2116	GEx Profile
				Survival Profile
DDX47	4.14e-05	899	2116	GEx Profile
				Survival Profile
GDI2	4.17e-05	837	2116	GEx Profile
				Survival Profile
MAP7D1	4.22e-05	765	1852	GEx Profile
				Survival Profile
RBBP7	4.24e-05	765	2116	GEx Profile
				Survival Profile
RACGAP1	4.25e-05	768	2116	GEx Profile
				Survival Profile
CDCA2	4.26e-05	757	2116	GEx Profile
				Survival Profile
RPS5	4.26e-05	693	2131	GEx Profile
				Survival Profile
PDIA6	4.31e-05	757	2116	GEx Profile
				Survival Profile
ZC3H18	4.33e-05	765	2116	GEx Profile
				Survival Profile
PRPF31	4.33e-05	757	2131	GEx Profile
				Survival Profile
PMS1	4.37e-05	827	2116	GEx Profile
				Survival Profile
CDC25C	4.41e-05	757	2131	GEx Profile
				Survival Profile
AK3L1	4.42e-05	827	2116	GEx Profile
				Survival Profile
IMPDH1	4.42e-05	931	2116	GEx Profile
				Survival Profile
ELOVL1	4.43e-05	837	2116	GEx Profile
				Survival Profile
MRPL42	4.43e-05	837	2116	GEx Profile
				Survival Profile
SGOL2	4.43e-05	899	2131	GEx Profile
				Survival Profile
DHX57	4.51e-05	827	1852	GEx Profile
				Survival Profile
GPSM2	4.52e-05	768	2131	GEx Profile
				Survival Profile
SERF1A	4.55e-05	899	2131	GEx Profile
				Survival Profile
DNTTIP2	4.55e-05	765	1852	GEx Profile
				Survival Profile
NOL6	4.55e-05	899	2116	GEx Profile
				Survival Profile
S100A9	4.61e-05	931	2542	GEx Profile
				Survival Profile
C12orf10	4.61e-05	931	2116	GEx Profile
				Survival Profile
ZMYM4	4.62e-05	837	2116	GEx Profile
				Survival Profile
LDHA	4.64e-05	770	2131	GEx Profile
				Survival Profile
CDKN2BAS	4.67e-05	724	2116	GEx Profile
				Survival Profile
NCOA5	4.7e-05	899	2116	GEx Profile
				Survival Profile
RAD51C	4.72e-05	765	2131	GEx Profile
				Survival Profile
COPG	4.72e-05	765	2116	GEx Profile
				Survival Profile
MRPL9	4.73e-05	757	2116	GEx Profile
				Survival Profile
C3orf55	4.75e-05	837	2116	GEx Profile
				Survival Profile
COPS7B	4.75e-05	837	2131	GEx Profile
				Survival Profile
PSMA1	4.76e-05	765	2116	GEx Profile
				Survival Profile
POLR2G	4.78e-05	757	2116	GEx Profile
				Survival Profile
NUP205	4.78e-05	837	2116	GEx Profile
				Survival Profile
UTP6	4.79e-05	899	2131	GEx Profile
				Survival Profile
FBXO5	4.81e-05	765	2116	GEx Profile
				Survival Profile
SRM	4.84e-05	639	2116	GEx Profile
				Survival Profile
C11orf45	4.88e-05	1088	2486	GEx Profile
				Survival Profile
UPF3B	5e-05	837	2131	GEx Profile
				Survival Profile
PPARG	5.02e-05	802	2116	GEx Profile
				Survival Profile
TEX10	5.04e-05	765	1852	GEx Profile
				Survival Profile
KIF4B	5.06e-05	768	2116	GEx Profile
				Survival Profile
UBE2S	5.08e-05	768	2116	GEx Profile
				Survival Profile
RPAP2	5.1e-05	837	2116	GEx Profile
				Survival Profile
HNRNPC	5.12e-05	899	2116	GEx Profile
				Survival Profile
NECAP2	5.13e-05	765	2116	GEx Profile
				Survival Profile
LOC646851	5.15e-05	837	2116	GEx Profile
				Survival Profile
SYS1	5.16e-05	1088	2456	GEx Profile
				Survival Profile
TTC4	5.19e-05	765	2116	GEx Profile
				Survival Profile
ANAPC5	5.2e-05	724	2116	GEx Profile
				Survival Profile
PPP1CC	5.21e-05	1005	2116	GEx Profile
				Survival Profile
TUBD1	5.23e-05	837	2131	GEx Profile
				Survival Profile
TXNDC9	5.25e-05	765	2116	GEx Profile
				Survival Profile
GNB1	5.29e-05	1088	2116	GEx Profile
				Survival Profile
CEP290	5.3e-05	765	2116	GEx Profile
				Survival Profile
SFT2D1	5.3e-05	931	2116	GEx Profile
				Survival Profile
DDX56	5.31e-05	724	2116	GEx Profile
				Survival Profile
PWP1	5.39e-05	765	2116	GEx Profile
				Survival Profile
HNRNPL	5.41e-05	899	2131	GEx Profile
				Survival Profile
PPP2R5E	5.44e-05	765	2116	GEx Profile
				Survival Profile
ZNF280C	5.46e-05	837	2116	GEx Profile
				Survival Profile
SNRPB2	5.49e-05	1005	2456	GEx Profile
				Survival Profile
CWF19L1	5.49e-05	765	2116	GEx Profile
				Survival Profile
ING5	5.5e-05	827	2116	GEx Profile
				Survival Profile
HCCS	5.52e-05	757	2116	GEx Profile
				Survival Profile
DCAF13	5.53e-05	1271	2116	GEx Profile
				Survival Profile
KIF2A	5.59e-05	837	2116	GEx Profile
				Survival Profile
EXO1	5.61e-05	765	2131	GEx Profile
				Survival Profile
ZNF271	5.62e-05	899	2116	GEx Profile
				Survival Profile
GMPS	5.65e-05	827	2116	GEx Profile
				Survival Profile
SEC24C	5.67e-05	765	2116	GEx Profile
				Survival Profile
KRIT1	5.69e-05	827	2116	GEx Profile
				Survival Profile
CCT3	5.71e-05	757	2116	GEx Profile
				Survival Profile
C20orf27	5.77e-05	837	2116	GEx Profile
				Survival Profile
USP24	5.78e-05	837	2116	GEx Profile
				Survival Profile
ATP6V0B	5.8e-05	765	2116	GEx Profile
				Survival Profile
IFT172	5.85e-05	765	2116	GEx Profile
				Survival Profile
CDK11A	5.85e-05	765	2116	GEx Profile
				Survival Profile
RCC2	5.86e-05	899	2116	GEx Profile
				Survival Profile
MTX1	5.9e-05	837	2131	GEx Profile
				Survival Profile
JRK	5.9e-05	827	2116	GEx Profile
				Survival Profile
RCC1	5.91e-05	757	2116	GEx Profile
				Survival Profile
PTRH2	5.94e-05	765	2131	GEx Profile
				Survival Profile
METTL4	5.97e-05	802	2116	GEx Profile
				Survival Profile
PPFIA3	6.05e-05	931	2456	GEx Profile
				Survival Profile
DUSP11	6.08e-05	899	2131	GEx Profile
				Survival Profile
HMGB2	6.1e-05	1005	2131	GEx Profile
				Survival Profile
CPSF6	6.1e-05	899	2116	GEx Profile
				Survival Profile
U2AF2	6.11e-05	837	2116	GEx Profile
				Survival Profile
UROD	6.23e-05	765	2116	GEx Profile
				Survival Profile
LOC729678	6.34e-05	827	2116	GEx Profile
				Survival Profile
C6orf134	6.4e-05	848	2131	GEx Profile
				Survival Profile
CLSPN	6.41e-05	768	2116	GEx Profile
				Survival Profile
FANCD2	6.43e-05	899	2131	GEx Profile
				Survival Profile
GTF3C6	6.45e-05	837	2131	GEx Profile
				Survival Profile
KIF18B	6.48e-05	757	2131	GEx Profile
				Survival Profile
CCDC59	6.48e-05	765	2131	GEx Profile
				Survival Profile
CSF1	6.49e-05	1005	2116	GEx Profile
				Survival Profile
BRD8	6.5e-05	827	2116	GEx Profile
				Survival Profile
COPS6	6.54e-05	765	2116	GEx Profile
				Survival Profile
MED7	6.57e-05	931	2131	GEx Profile
				Survival Profile
SLC48A1	6.64e-05	931	2116	GEx Profile
				Survival Profile
TJAP1	6.69e-05	837	2116	GEx Profile
				Survival Profile
MRPS35	6.7e-05	837	2116	GEx Profile
				Survival Profile
CDK4	6.72e-05	765	2116	GEx Profile
				Survival Profile
ILF2	6.72e-05	768	2131	GEx Profile
				Survival Profile
SSU72	6.79e-05	757	2116	GEx Profile
				Survival Profile
UBR5	6.82e-05	802	2116	GEx Profile
				Survival Profile
B3GNTL1	6.96e-05	848	2116	GEx Profile
				Survival Profile
SRXN1	6.96e-05	802	2116	GEx Profile
				Survival Profile
FAM156A	6.98e-05	765	1852	GEx Profile
				Survival Profile
PDSS1	6.99e-05	724	2116	GEx Profile
				Survival Profile
FAM119A	7.01e-05	827	2131	GEx Profile
				Survival Profile
CSNK1D	7.07e-05	848	2131	GEx Profile
				Survival Profile
DNMT3A	7.11e-05	899	2131	GEx Profile
				Survival Profile
TOMM5	7.12e-05	899	1852	GEx Profile
				Survival Profile
NUP85	7.14e-05	848	2131	GEx Profile
				Survival Profile
CHAF1B	7.21e-05	768	2131	GEx Profile
				Survival Profile
PPP5C	7.27e-05	765	2116	GEx Profile
				Survival Profile
KCTD17	7.27e-05	1005	2131	GEx Profile
				Survival Profile
C9orf30	7.35e-05	1005	2116	GEx Profile
				Survival Profile
NCAPH	7.35e-05	768	2131	GEx Profile
				Survival Profile
RNF7	7.43e-05	931	2116	GEx Profile
				Survival Profile
PRKAG1	7.44e-05	837	2116	GEx Profile
				Survival Profile
IER3IP1	7.46e-05	768	2116	GEx Profile
				Survival Profile
TMCO4	7.47e-05	848	2116	GEx Profile
				Survival Profile
ANKZF1	7.53e-05	837	2116	GEx Profile
				Survival Profile
CHML	7.64e-05	837	2131	GEx Profile
				Survival Profile
TTC9C	7.72e-05	827	2116	GEx Profile
				Survival Profile
MUTYH	7.74e-05	765	2116	GEx Profile
				Survival Profile
SLC25A19	7.74e-05	1135	2116	GEx Profile
				Survival Profile
FAM49B	7.79e-05	1135	2116	GEx Profile
				Survival Profile
DYNLT1	7.82e-05	1005	2131	GEx Profile
				Survival Profile
CCDC21	7.86e-05	848	2131	GEx Profile
				Survival Profile
VSIG10	7.87e-05	724	2116	GEx Profile
				Survival Profile
ARL8B	7.88e-05	765	1852	GEx Profile
				Survival Profile
LOC646762	7.9e-05	837	2116	GEx Profile
				Survival Profile
ITGA5	7.95e-05	931	2131	GEx Profile
				Survival Profile
GNG5	7.98e-05	765	2116	GEx Profile
				Survival Profile
IMPDH2	8.04e-05	757	2116	GEx Profile
				Survival Profile
BCCIP	8.04e-05	802	2116	GEx Profile
				Survival Profile
RNASEH2A	8.06e-05	768	2116	GEx Profile
				Survival Profile
HDGF	8.11e-05	899	2131	GEx Profile
				Survival Profile
ZFP64	8.19e-05	837	2131	GEx Profile
				Survival Profile
RBX1	8.23e-05	931	2116	GEx Profile
				Survival Profile
MCM3APAS	8.25e-05	765	2131	GEx Profile
				Survival Profile
DYNC1H1	8.29e-05	827	1852	GEx Profile
				Survival Profile
HDDC2	8.29e-05	765	2116	GEx Profile
				Survival Profile
RNF220	8.31e-05	765	2116	GEx Profile
				Survival Profile
CDK5R1	8.49e-05	1005	2131	GEx Profile
				Survival Profile
RABGGTB	8.5e-05	757	2116	GEx Profile
				Survival Profile
PDCD5	8.51e-05	765	2116	GEx Profile
				Survival Profile
DAZAP1	8.51e-05	765	2116	GEx Profile
				Survival Profile
LAPTM4B	8.52e-05	1149	2116	GEx Profile
				Survival Profile
PPIH	8.55e-05	1005	2116	GEx Profile
				Survival Profile
PLCH1	8.6e-05	1005	2116	GEx Profile
				Survival Profile
DBF4	8.67e-05	765	2116	GEx Profile
				Survival Profile
CHMP4A	8.72e-05	765	2456	GEx Profile
				Survival Profile
RPL13P5	8.72e-05	827	2116	GEx Profile
				Survival Profile
TMEM165	8.74e-05	1005	2116	GEx Profile
				Survival Profile
EIF1B	8.76e-05	899	2116	GEx Profile
				Survival Profile
PSMA7	8.77e-05	757	2116	GEx Profile
				Survival Profile
RQCD1	8.89e-05	765	2116	GEx Profile
				Survival Profile
ARCN1	8.95e-05	837	2116	GEx Profile
				Survival Profile
RPS8	8.98e-05	757	2116	GEx Profile
				Survival Profile
FOXM1	9.14e-05	757	2116	GEx Profile
				Survival Profile
KIAA1524	9.21e-05	837	2131	GEx Profile
				Survival Profile
HEATR6	9.22e-05	827	2456	GEx Profile
				Survival Profile
LRRC42	9.34e-05	837	2116	GEx Profile
				Survival Profile
HNRNPA2B1	9.34e-05	1005	2116	GEx Profile
				Survival Profile
TMEM22	9.52e-05	1149	2131	GEx Profile
				Survival Profile
ISY1	9.62e-05	899	2116	GEx Profile
				Survival Profile
IDH3B	9.63e-05	848	2116	GEx Profile
				Survival Profile
LOC440944	9.63e-05	899	2116	GEx Profile
				Survival Profile
METTL3	9.66e-05	765	2116	GEx Profile
				Survival Profile
HECTD3	9.67e-05	848	2116	GEx Profile
				Survival Profile
MTERFD2	9.81e-05	1135	2456	GEx Profile
				Survival Profile
SRRT	9.83e-05	765	1852	GEx Profile
				Survival Profile
BRD9	9.84e-05	1135	1791	GEx Profile
				Survival Profile
NUP210	9.94e-05	899	1852	GEx Profile
				Survival Profile
EID3	9.97e-05	1005	2116	GEx Profile
				Survival Profile
GRWD1	0.0001	765	2116	GEx Profile
				Survival Profile
UBTD2	0.0001005	837	2131	GEx Profile
				Survival Profile
SSR3	0.0001007	837	2116	GEx Profile
				Survival Profile
LIPT1	0.0001012	931	2116	GEx Profile
				Survival Profile
MLLT10	0.0001014	1005	2131	GEx Profile
				Survival Profile
BCL10	0.0001015	827	2116	GEx Profile
				Survival Profile
RFC2	0.0001015	757	2116	GEx Profile
				Survival Profile
BAMBI	0.0001024	837	2116	GEx Profile
				Survival Profile
C13orf37	0.0001025	837	2116	GEx Profile
				Survival Profile
HTR3A	0.0001031	765	2131	GEx Profile
				Survival Profile
CLCN2	0.0001031	848	2116	GEx Profile
				Survival Profile
PARD6G	0.0001034	768	2131	GEx Profile
				Survival Profile
ELMO2	0.0001035	899	2116	GEx Profile
				Survival Profile
EED	0.0001042	899	2116	GEx Profile
				Survival Profile
ZNF391	0.0001046	899	2131	GEx Profile
				Survival Profile
HJURP	0.0001051	765	2131	GEx Profile
				Survival Profile
EIF4E	0.0001052	827	2131	GEx Profile
				Survival Profile
C1orf77	0.0001056	899	2116	GEx Profile
				Survival Profile
MAPT	0.0001061	802	2116	GEx Profile
				Survival Profile
MTBP	0.0001073	765	2116	GEx Profile
				Survival Profile
C14orf153	0.0001088	837	2131	GEx Profile
				Survival Profile
MED10	0.0001097	899	2131	GEx Profile
				Survival Profile
SMARCAD1	0.0001101	1135	2116	GEx Profile
				Survival Profile
EPHX4	0.0001101	899	2116	GEx Profile
				Survival Profile
ZNF133	0.0001107	899	2131	GEx Profile
				Survival Profile
SGOL1	0.000111	899	2131	GEx Profile
				Survival Profile
TIMM9	0.0001112	899	2116	GEx Profile
				Survival Profile
EWSR1	0.0001114	899	2116	GEx Profile
				Survival Profile
APEX1	0.0001121	724	2116	GEx Profile
				Survival Profile
HARS	0.0001126	1149	2116	GEx Profile
				Survival Profile
AMD1	0.0001127	1005	2116	GEx Profile
				Survival Profile
MAN1B1	0.0001142	765	2116	GEx Profile
				Survival Profile
AP2M1	0.0001144	757	1852	GEx Profile
				Survival Profile
RAD54B	0.0001146	768	2116	GEx Profile
				Survival Profile
BZW2	0.0001151	765	2116	GEx Profile
				Survival Profile
C2orf18	0.0001159	837	2131	GEx Profile
				Survival Profile
NSUN5	0.0001167	724	2116	GEx Profile
				Survival Profile
MITD1	0.0001171	765	2131	GEx Profile
				Survival Profile
MRPL50	0.0001178	1005	2116	GEx Profile
				Survival Profile
UTP3	0.0001178	827	2131	GEx Profile
				Survival Profile
MELK	0.0001179	768	2116	GEx Profile
				Survival Profile
PCBP2	0.0001183	837	2116	GEx Profile
				Survival Profile
TRAIP	0.0001185	757	2116	GEx Profile
				Survival Profile
PAICS	0.0001193	837	1852	GEx Profile
				Survival Profile
C18orf21	0.0001193	757	2116	GEx Profile
				Survival Profile
C4orf46	0.0001195	1135	2131	GEx Profile
				Survival Profile
RAB7A	0.0001197	837	2116	GEx Profile
				Survival Profile
C4orf43	0.0001199	837	2116	GEx Profile
				Survival Profile
HEXB	0.000121	1005	2456	GEx Profile
				Survival Profile
GSK3A	0.0001211	899	1852	GEx Profile
				Survival Profile
HNRNPH3	0.0001213	1135	2116	GEx Profile
				Survival Profile
AKR1C3	0.0001219	757	2116	GEx Profile
				Survival Profile
POMP	0.000122	768	2131	GEx Profile
				Survival Profile
YWHAZ	0.0001225	1149	2116	GEx Profile
				Survival Profile
TSPO	0.000123	1135	2116	GEx Profile
				Survival Profile
SLC36A1	0.0001239	899	2116	GEx Profile
				Survival Profile
TINAG	0.0001242	1088	2116	GEx Profile
				Survival Profile
SNHG1	0.0001243	757	2116	GEx Profile
				Survival Profile
ACD	0.0001246	899	2131	GEx Profile
				Survival Profile
XRCC1	0.0001249	899	2116	GEx Profile
				Survival Profile
NFYC	0.000125	765	2116	GEx Profile
				Survival Profile
UQCRH	0.0001258	765	2131	GEx Profile
				Survival Profile
DCAF7	0.0001259	827	2116	GEx Profile
				Survival Profile
LSG1	0.0001264	1005	1852	GEx Profile
				Survival Profile
BTF3	0.000127	899	2116	GEx Profile
				Survival Profile
APLP2	0.0001274	827	2131	GEx Profile
				Survival Profile
GNA14	0.0001277	2532	1386	GEx Profile
				Survival Profile
LEPRE1	0.0001278	757	1852	GEx Profile
				Survival Profile
RBMX	0.0001279	899	2116	GEx Profile
				Survival Profile
SNRPB	0.0001279	899	2116	GEx Profile
				Survival Profile
RECQL4	0.0001281	724	2116	GEx Profile
				Survival Profile
ANKRD27	0.0001283	1005	2131	GEx Profile
				Survival Profile
ECT2	0.0001289	768	2131	GEx Profile
				Survival Profile
PUS7	0.0001297	802	2116	GEx Profile
				Survival Profile
DDX54	0.0001301	1005	2116	GEx Profile
				Survival Profile
TOMM34	0.0001309	899	2131	GEx Profile
				Survival Profile
ENTPD2	0.0001309	1005	2131	GEx Profile
				Survival Profile
SEC31A	0.0001312	1088	2131	GEx Profile
				Survival Profile
DAP	0.0001315	837	2116	GEx Profile
				Survival Profile
GZF1	0.0001319	899	2116	GEx Profile
				Survival Profile
CLEC2L	0.0001319	802	2116	GEx Profile
				Survival Profile
RAP1GAP2	0.000132	827	2116	GEx Profile
				Survival Profile
SAMD1	0.0001327	837	1852	GEx Profile
				Survival Profile
INTS12	0.0001337	1005	2116	GEx Profile
				Survival Profile
GINS2	0.0001339	768	2116	GEx Profile
				Survival Profile
SRP19	0.000134	757	2116	GEx Profile
				Survival Profile
BOP1	0.0001347	1229	2131	GEx Profile
				Survival Profile
MAFG	0.000136	837	1852	GEx Profile
				Survival Profile
NAA40	0.0001365	765	2116	GEx Profile
				Survival Profile
MICALL1	0.0001371	1005	2116	GEx Profile
				Survival Profile
STC2	0.0001373	837	2131	GEx Profile
				Survival Profile
UBE2CBP	0.0001376	827	2116	GEx Profile
				Survival Profile
TWF1	0.0001388	1005	2116	GEx Profile
				Survival Profile
TAGLN2	0.000139	1088	2456	GEx Profile
				Survival Profile
LOC407835	0.0001407	1005	2131	GEx Profile
				Survival Profile
ITGB3BP	0.0001419	765	2131	GEx Profile
				Survival Profile
TAF1B	0.0001421	837	2116	GEx Profile
				Survival Profile
DSCC1	0.0001426	837	1852	GEx Profile
				Survival Profile
CRIPT	0.0001428	837	2116	GEx Profile
				Survival Profile
TMEM48	0.0001439	848	2116	GEx Profile
				Survival Profile
C1orf88	0.000144	848	2131	GEx Profile
				Survival Profile
SOHLH2	0.0001448	837	2131	GEx Profile
				Survival Profile
GGA3	0.0001448	899	2116	GEx Profile
				Survival Profile
DNAJC8	0.0001453	757	2116	GEx Profile
				Survival Profile
DUSP5P	0.0001453	837	2131	GEx Profile
				Survival Profile
MAPK3	0.0001462	1005	2116	GEx Profile
				Survival Profile
C12orf44	0.0001467	931	2131	GEx Profile
				Survival Profile
RRM2	0.0001468	757	2116	GEx Profile
				Survival Profile
MRPL36	0.0001473	768	2131	GEx Profile
				Survival Profile
TYMS	0.0001487	757	2116	GEx Profile
				Survival Profile
BUB1	0.000149	768	2131	GEx Profile
				Survival Profile
RAC1	0.0001494	1135	2116	GEx Profile
				Survival Profile
TMEM194A	0.0001497	765	2116	GEx Profile
				Survival Profile
RIMS3	0.0001507	724	1852	GEx Profile
				Survival Profile
LPCAT4	0.0001516	1135	2116	GEx Profile
				Survival Profile
DHX34	0.0001525	757	1852	GEx Profile
				Survival Profile
CCDC23	0.0001527	765	2116	GEx Profile
				Survival Profile
TRIP13	0.000154	765	2116	GEx Profile
				Survival Profile
RAB10	0.0001545	837	1852	GEx Profile
				Survival Profile
FIG4	0.0001559	899	2116	GEx Profile
				Survival Profile
ZMYM1	0.0001559	837	2116	GEx Profile
				Survival Profile
DPY30	0.0001567	931	2131	GEx Profile
				Survival Profile
NPHP1	0.000157	768	2116	GEx Profile
				Survival Profile
WBSCR22	0.0001571	724	2116	GEx Profile
				Survival Profile
ACYP1	0.0001572	765	2116	GEx Profile
				Survival Profile
MFF	0.0001573	899	2116	GEx Profile
				Survival Profile
ANLN	0.0001579	1005	2116	GEx Profile
				Survival Profile
EXTL3	0.0001579	899	2116	GEx Profile
				Survival Profile
ANKLE2	0.0001588	899	2116	GEx Profile
				Survival Profile
GABRA3	0.0001599	837	2131	GEx Profile
				Survival Profile
SCAMP4	0.0001615	899	2116	GEx Profile
				Survival Profile
FEN1	0.0001615	765	2116	GEx Profile
				Survival Profile
IPO13	0.0001619	765	2116	GEx Profile
				Survival Profile
PRKAB1	0.000162	837	2131	GEx Profile
				Survival Profile
ANKRD26	0.0001626	802	2116	GEx Profile
				Survival Profile
ERGIC2	0.0001628	827	2116	GEx Profile
				Survival Profile
SLC39A10	0.0001635	802	2116	GEx Profile
				Survival Profile
SUPT7L	0.0001639	1005	2116	GEx Profile
				Survival Profile
ZNF589	0.000164	1005	2116	GEx Profile
				Survival Profile
PLBD1	0.0001648	899	2116	GEx Profile
				Survival Profile
TPM3	0.0001652	899	2116	GEx Profile
				Survival Profile
UTP20	0.0001661	899	1852	GEx Profile
				Survival Profile
RPS27A	0.0001662	899	2131	GEx Profile
				Survival Profile
SMARCB1	0.0001665	827	2116	GEx Profile
				Survival Profile
FAM24B	0.0001669	1005	2131	GEx Profile
				Survival Profile
RP9P	0.000167	837	2116	GEx Profile
				Survival Profile
MCM6	0.0001676	765	2116	GEx Profile
				Survival Profile
CFL1	0.0001677	837	2116	GEx Profile
				Survival Profile
COX7A2L	0.0001678	765	2116	GEx Profile
				Survival Profile
MAGEA2	0.000168	1005	2131	GEx Profile
				Survival Profile
RPL5	0.0001695	757	2116	GEx Profile
				Survival Profile
NOL9	0.00017	848	1852	GEx Profile
				Survival Profile
THUMPD3	0.0001704	899	2116	GEx Profile
				Survival Profile
VASP	0.0001704	1135	2131	GEx Profile
				Survival Profile
FAM104A	0.0001716	848	2116	GEx Profile
				Survival Profile
TARS	0.0001737	765	2116	GEx Profile
				Survival Profile
TXNL1	0.0001738	765	1791	GEx Profile
				Survival Profile
LOC389705	0.000175	837	2456	GEx Profile
				Survival Profile
CCDC142	0.0001769	765	2116	GEx Profile
				Survival Profile
EIF2B5	0.0001771	757	1852	GEx Profile
				Survival Profile
SLC26A11	0.0001775	899	2116	GEx Profile
				Survival Profile
RFC4	0.0001778	768	2116	GEx Profile
				Survival Profile
FAM54A	0.0001783	768	2116	GEx Profile
				Survival Profile
MAP4K2	0.0001784	765	2116	GEx Profile
				Survival Profile
CKAP5	0.0001785	899	2116	GEx Profile
				Survival Profile
PPP1CB	0.0001786	837	2116	GEx Profile
				Survival Profile
CRNKL1	0.0001789	899	2116	GEx Profile
				Survival Profile
MAGEA12	0.0001791	848	2131	GEx Profile
				Survival Profile
UBE2O	0.0001792	848	2116	GEx Profile
				Survival Profile
CLCNKB	0.0001794	1135	2532	GEx Profile
				Survival Profile
RG9MTD1	0.0001796	899	2116	GEx Profile
				Survival Profile
CAPZA1	0.0001797	1005	2116	GEx Profile
				Survival Profile
ZNF259	0.0001805	837	2131	GEx Profile
				Survival Profile
COPB1	0.0001805	765	2116	GEx Profile
				Survival Profile
MKNK2	0.0001805	693	2116	GEx Profile
				Survival Profile
CDC7	0.0001812	765	2116	GEx Profile
				Survival Profile
RLF	0.0001819	837	2116	GEx Profile
				Survival Profile
ZNF408	0.0001823	827	2116	GEx Profile
				Survival Profile
CHAC2	0.0001825	837	2131	GEx Profile
				Survival Profile
GPATCH4	0.000183	931	2131	GEx Profile
				Survival Profile
TUBA4A	0.0001847	931	2131	GEx Profile
				Survival Profile
C1orf144	0.0001848	765	2116	GEx Profile
				Survival Profile
RBM14	0.0001855	827	2116	GEx Profile
				Survival Profile
C7orf36	0.0001861	765	2116	GEx Profile
				Survival Profile
MYCBP	0.0001863	765	2116	GEx Profile
				Survival Profile
ETV1	0.0001865	837	2116	GEx Profile
				Survival Profile
PTGES3	0.000187	837	2116	GEx Profile
				Survival Profile
CDHR4	0.0001871	1088	2116	GEx Profile
				Survival Profile
SRP72	0.0001879	837	2116	GEx Profile
				Survival Profile
WTAP	0.0001888	837	2116	GEx Profile
				Survival Profile
TTC26	0.0001905	837	1852	GEx Profile
				Survival Profile
MAP7D3	0.0001909	837	2131	GEx Profile
				Survival Profile
RRP7B	0.0001918	1005	2131	GEx Profile
				Survival Profile
VTA1	0.0001919	768	2116	GEx Profile
				Survival Profile
ARPC4	0.0001925	1005	2116	GEx Profile
				Survival Profile
E2F4	0.0001926	837	2116	GEx Profile
				Survival Profile
CCDC86	0.0001933	765	1852	GEx Profile
				Survival Profile
ZNF205	0.0001938	765	2116	GEx Profile
				Survival Profile
CLIC1	0.0001947	1005	2116	GEx Profile
				Survival Profile
NET1	0.0001955	899	2131	GEx Profile
				Survival Profile
AZI1	0.0001971	765	2116	GEx Profile
				Survival Profile
RBM19	0.0001991	837	1852	GEx Profile
				Survival Profile
S100A16	0.0001997	837	2131	GEx Profile
				Survival Profile
EDC3	0.0001998	899	2131	GEx Profile
				Survival Profile
ANKRD32	0.0002021	848	2116	GEx Profile
				Survival Profile
ARMC7	0.000203	848	2131	GEx Profile
				Survival Profile
NUF2	0.000204	765	2116	GEx Profile
				Survival Profile
HMGA1	0.0002045	1005	1852	GEx Profile
				Survival Profile
CTSA	0.000205	1088	2131	GEx Profile
				Survival Profile
EPO	0.0002051	899	2131	GEx Profile
				Survival Profile
PGA3	0.0002054	837	2532	GEx Profile
				Survival Profile
ACRV1	0.000206	757	2116	GEx Profile
				Survival Profile
FBXO18	0.0002072	1135	2116	GEx Profile
				Survival Profile
PHF19	0.0002083	768	2116	GEx Profile
				Survival Profile
DOCK7	0.0002088	848	1852	GEx Profile
				Survival Profile
H2AFZ	0.0002089	1135	2116	GEx Profile
				Survival Profile
ZFYVE26	0.0002098	848	2131	GEx Profile
				Survival Profile
NRIP3	0.0002101	1135	1852	GEx Profile
				Survival Profile
SMC4	0.0002103	768	2116	GEx Profile
				Survival Profile
EIF2B4	0.0002104	827	2116	GEx Profile
				Survival Profile
UNC50	0.0002105	899	2116	GEx Profile
				Survival Profile
SLC41A3	0.0002109	931	2131	GEx Profile
				Survival Profile
SOX4	0.0002115	1005	2116	GEx Profile
				Survival Profile
CDC42EP2	0.0002119	827	2131	GEx Profile
				Survival Profile
POP1	0.0002125	765	1852	GEx Profile
				Survival Profile
ARTN	0.0002131	899	2116	GEx Profile
				Survival Profile
C1GALT1	0.0002135	899	2131	GEx Profile
				Survival Profile
E2F6	0.0002141	1005	2116	GEx Profile
				Survival Profile
CDK20	0.0002168	1135	2116	GEx Profile
				Survival Profile
VPS54	0.000217	899	2116	GEx Profile
				Survival Profile
CENPL	0.000218	765	2116	GEx Profile
				Survival Profile
GSK3B	0.000218	837	2116	GEx Profile
				Survival Profile
C2orf68	0.0002181	848	2116	GEx Profile
				Survival Profile
RAB35	0.0002183	765	2116	GEx Profile
				Survival Profile
HEATR1	0.000219	837	1852	GEx Profile
				Survival Profile
NT5C	0.0002192	1135	2131	GEx Profile
				Survival Profile
PANK2	0.0002193	765	2116	GEx Profile
				Survival Profile
NOL10	0.0002195	1005	2116	GEx Profile
				Survival Profile
VPS45	0.0002195	931	2116	GEx Profile
				Survival Profile
PSMD9	0.0002196	757	2116	GEx Profile
				Survival Profile
SLC35C2	0.0002197	899	2116	GEx Profile
				Survival Profile
TMX2	0.0002207	848	2131	GEx Profile
				Survival Profile
PLEKHH1	0.0002212	848	2116	GEx Profile
				Survival Profile
COPZ1	0.0002223	899	2116	GEx Profile
				Survival Profile
PRMT5	0.0002225	837	2116	GEx Profile
				Survival Profile
C18orf54	0.0002226	1005	2131	GEx Profile
				Survival Profile
RRAGC	0.0002243	837	2116	GEx Profile
				Survival Profile
LOC152217	0.0002247	931	2131	GEx Profile
				Survival Profile
MLH1	0.0002272	899	2131	GEx Profile
				Survival Profile
KATNA1	0.0002273	768	2116	GEx Profile
				Survival Profile
MMP13	0.0002276	931	2131	GEx Profile
				Survival Profile
ORC6L	0.0002276	768	2116	GEx Profile
				Survival Profile
HNRNPA0	0.0002289	1005	2116	GEx Profile
				Survival Profile
CDT1	0.0002301	768	2116	GEx Profile
				Survival Profile
NDRG1	0.0002304	1005	2116	GEx Profile
				Survival Profile
SMNDC1	0.0002312	1005	2116	GEx Profile
				Survival Profile
CD63	0.0002313	1005	2116	GEx Profile
				Survival Profile
ZNF335	0.0002315	899	2116	GEx Profile
				Survival Profile
ANKRD13B	0.0002316	1149	1852	GEx Profile
				Survival Profile
DND1	0.0002328	848	2116	GEx Profile
				Survival Profile
CORO1C	0.0002329	1005	1852	GEx Profile
				Survival Profile
TMEM164	0.0002331	848	2116	GEx Profile
				Survival Profile
EFNA3	0.0002334	1005	2131	GEx Profile
				Survival Profile
B4GALT2	0.0002336	848	2116	GEx Profile
				Survival Profile
POP7	0.0002341	931	2116	GEx Profile
				Survival Profile
DARS	0.0002357	1005	2116	GEx Profile
				Survival Profile
KIAA0319L	0.0002359	768	2116	GEx Profile
				Survival Profile
C2orf52	0.0002363	848	2456	GEx Profile
				Survival Profile
FTSJ2	0.0002379	765	2116	GEx Profile
				Survival Profile
RPAP3	0.0002391	765	2116	GEx Profile
				Survival Profile
PAQR7	0.0002394	827	2116	GEx Profile
				Survival Profile
SMAP1	0.0002398	931	2116	GEx Profile
				Survival Profile
ACTR1A	0.0002403	931	2116	GEx Profile
				Survival Profile
GLT25D1	0.0002415	1005	2116	GEx Profile
				Survival Profile
ERCC6L	0.0002416	765	2131	GEx Profile
				Survival Profile
LOC645676	0.0002416	931	2131	GEx Profile
				Survival Profile
CTU2	0.0002419	724	1852	GEx Profile
[truncated: 9,534 more rows]
